# Supplementary material
Source: Elsevier journal article supplement (https://www.sciencedirect.com/science/article/pii/S1134793720300348)
Supplement: mmc1 [file S1134793720300348:mmc1.docx]

**Anexo 1**

**Coronavirus Anxiety Scale**(CAS; Lee, 2020a)

Traducción de Caycho-Rodríguez et al. (2020)

¿Con qué frecuencia ha experimentado las siguientes actividades en las últimas 2 semanas?

1. Me sentí mareado, aturdido o débil cuando leí o escuché noticias sobre el COVID-19.

| De ninguna manera | Rara vez, menos de un día o dos. | Varios días | Más de 7 días | Casi todos los días  en las últimas 2 semanas |
| --- | --- | --- | --- | --- |
| 0 | 1 | 2 | 3 | 4 |

1. Tuve problemas para quedarme dormido porque estaba pensando en el COVID-19

| De ninguna manera | Rara vez, menos de un día o dos. | Varios días | Más de 7 días | Casi todos los días  en las últimas 2 semanas |
| --- | --- | --- | --- | --- |
| 0 | 1 | 2 | 3 | 4 |

1. Me sentí paralizado o congelado cuando pensaba o estaba expuesto a información sobre el COVID-19.

| De ninguna manera | Rara vez, menos de un día o dos. | Varios días | Más de 7 días | Casi todos los días  en las últimas 2 semanas |
| --- | --- | --- | --- | --- |
| 0 | 1 | 2 | 3 | 4 |

1. Perdí interés en comer cuando pensaba o estaba expuesto a información sobre el COVID-19.

| De ninguna manera | Rara vez, menos de un día o dos. | Varios días | Más de 7 días | Casi todos los días  en las últimas 2 semanas |
| --- | --- | --- | --- | --- |
| 0 | 1 | 2 | 3 | 4 |

1. Sentí náuseas o problemas estomacales cuando pensaba o estaba expuesto a información sobre el COVID-19.

| De ninguna manera | Rara vez, menos de un día o dos. | Varios días | Más de 7 días | Casi todos los días  en las últimas 2 semanas |
| --- | --- | --- | --- | --- |
| 0 | 1 | 2 | 3 | 4 |
